# Supplementary material for: Adherence to the Western, Prudent, and Mediterranean dietary patterns and chronic lymphocytic leukemia in the MCC-Spain study
Source: PubMed Central journal article supplement — Haematologica. 2018 Jun 28;103(11):1881–8. doi: 10.3324/haematol.2018.192526 (PMC6278961; doi:10.3324/haematol.2018.192526), 2018-11
Supplement: 2018_192526-Disclosures_and_Contributions.pdf [file 2018_192526-Disclosures_and_Contributions.pdf]

Haematologica  
HAEMATOL/2018/192526  
Version 3

Adherence to the Western, Prudent, and Mediterranean dietary patterns and chronic lymphocytic leukemia in the MCC-Spain study.

Marta Solans, Adela Castelló, Yolanda Benavente, Rafael Marcos-Gragera, Pilar Amiano, Esther Gracia-Lavedan, Laura Costas, Claudia Robles, Eva Gonzalez Barca, Esmeralda de la Banda, Esther Alonso, Marta Aymerich, Elias Campo, Trinidad Dierssen-Sotos, Guillermo Fernández-Tardón, Rocio Olmedo-Requena, Eva Gimeno, Gemma Castaño-Vinyals, Nuria Aragonés, Manolis Kogevinas, Silvia de Sanjose, Marina Pollán, and Delphine Casabonne

Disclosures: 'none'

Contributions: Study conception and design: MP, MK, NA, GC, SS, PA Acquisition of the data: SS, DC, YB, RMG, PA, EGL, LC, CR, EGB, EB, EA, MA, EC, EG, TDS, GFT, ROR Analysis of the data: AC Interpretation of the data: MS, AC, YB, MP, DC Writing the article: MS Critical revision of the article: All authors approved the final manuscript and the decision to submit the manuscript
